# Supplementary material
Source: PubMed Central journal article supplement (PMC4116331)
Supplement: NIHMS603917-supplement-01.pdf [file NIHMS603917-supplement-01.pdf]

## Supplemental Data

Supplementary Table S1. *In vitro* inhibitory activities of F3284-8495 and analogs

| Compound   | Structure | IC <sub>50</sub> (μM) <sup>a</sup> |                |            |
|------------|-----------|------------------------------------|----------------|------------|
|            |           | RT-RNase H <sup>b</sup>            | P15-EC RNase H | RT DNA pol |
| F3284-8495 |           | 4.8                                | >10            | >10        |
| F3385-0136 |           | 7.7                                | >10            | >10        |
| F3385-2028 |           | 5.8                                | 5.1            | >10        |
| F1864-0071 |           | 4.9                                | 2.2            | >10        |
| F3385-2593 |           | 4.3                                | 4.0            | >10        |
| F3139-2515 |           | 3.9                                | 3.2            | 3.7        |
| F3385-2584 |           | 3.6                                | 1.8            | >10        |
| F3385-2594 |           | 3.3                                | 2.2            | >10        |
| F3385-2531 |           | 2.3                                | 0.6            | >10        |
| F3385-2581 |           | 2.2                                | 0.1            | 2.2        |
| F3385-2588 |           | 2.1                                | 1.5            | >10        |
| F3385-2590 |           | 0.8                                | 0.2            | 2.5        |

<sup>a</sup>Data are the averages of two separate determinations each carried out over a range of eight inhibitor concentrations

<sup>b</sup>Assayed at pH 7.4, 1 mM Mg<sup>2+</sup>
